# Supplementary material for: The Porcine Nasal Microbiota with Particular Attention to Livestock-Associated Methicillin-Resistant Staphylococcus aureus in Germany—A Culturomic Approach
Source: MDPI journal article supplement (doi:10.3390/microorganisms8040514), 2020-04-04
Supplement: s1 [file s1]

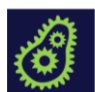**Table 1.** Phenotypic antimicrobial susceptibility profiles of *E. coli* isolates from farms #1 to #3.

| Farm | Individual | Habitat       | Resistance Profile <sup>a</sup>                  | # of Isolates |
|------|------------|---------------|--------------------------------------------------|---------------|
| #1   | #1         | Nasal cavity  | AMP, AMC, AMO, PIP, AMS, TRS                     | 4             |
|      |            | Snout surface | AMP, AMC, AMO, PIP, AMS, TRS                     | 2             |
|      |            |               | -                                                | 1             |
|      | #5         | Nasal cavity  | TET                                              | 2             |
|      |            | Snout surface | AMP, AMC, AMO, PIP, AMS, TRS, TET                | 2             |
|      | #6         | Nasal cavity  | AMP, AMC, AMO, PIP, AMS, TRS, TET                | 2             |
| #2   | #1         |               | TET                                              | 1             |
|      |            | Nasal cavity  | AMP, AMC, AMO, PIP, AMS, TRS, TET                | 4             |
|      |            | Nasal cavity  | TRS                                              | 1             |
| #3   | #1         | Snout surface | -                                                | 1             |
|      |            |               | AMP, AMC, AMO, CIP, LEV, MOX, PIP, AMS, TRS, TET | 2             |
|      |            | Nasal cavity  | AMP, AMC, AMO, CIP, LEV, MOX, PIP, AMS           | 6             |
|      | #2         |               | AMP, AMO, CIP, LEV, MOX, PIP, TRS, TET           | 1             |
|      |            |               | AMP, AMC, AMO, CIP, LEV, MOX, PIP, AMS, TRS, TET | 3             |
|      |            | Snout surface | AMP, AMC, AMO, CIP, LEV, MOX, PIP, AMS, PIT      | 1             |
|      | #3         |               | AMP, AMC, AMO, CIP, LEV, MOX, PIP, AMS           | 3             |
|      |            | Nasal cavity  | AMP, AMC, AMO, CIP, LEV, MOX, PIP, AMS, TET      | 1             |
|      |            |               | AMP, AMO, PIP, TET                               | 1             |
|      | #3         | Snout surface | TRS, TET                                         | 1             |
|      |            |               | MOX                                              | 4             |
|      |            |               | -                                                | 1             |

<sup>a</sup> as determined by Vitek 2 using cards AST-N214; AMP, ampicillin; AMC, amoxicillin-clavulanate; AMO, amoxicillin; AMS, ampicillin-sulbactam; CIP, ciprofloxacin; CZO, cefazolin; GEN, gentamicin; LEV, levofloxacin; MOX, moxifloxacin; PIP, piperacillin; PIT, piperacillin-tazobactam; TET, tetracycline; TRS, trimethoprim/sulfamethoxazol

**Table 2.** Phenotypic antimicrobial susceptibility profiles of *E. coli* isolates from farms #4 to #7.

| Farm | Individual | Habitat       | Resistance Profile <sup>a</sup>                       | # of Isolates |
|------|------------|---------------|-------------------------------------------------------|---------------|
| #4   | #1         | Nasal cavity  | TET                                                   | 1             |
|      |            |               | -                                                     | 1             |
|      |            | Snout surface | -                                                     | 3             |
|      | #3         |               | AMP, AMC, AMO, PIP, AMS, TET                          | 1             |
|      |            | Nasal cavity  | TET                                                   | 2             |
|      |            |               | -                                                     | 1             |
| #5   | #1         | Snout surface | AMP, AMC, AMO, GEN, PIP, AMS, TRS, TET, PIT           | 1             |
|      |            |               | AMP, AMC, AMO, PIP, AMS, TRS, TET, PIT                | 1             |
|      |            |               | AMP, AMC, AMO, PIP, AMS, TRS, TET                     | 1             |
|      | #2         | Snout surface | AMP, AMC, AMO, CIP, LEV, MOX, PIP, AMS, TRS, TET, PIT | 1             |
|      |            |               | AMP, AMC, AMO, GEN, PIP, AMS                          | 1             |
|      |            |               | AMP, AMC, AMO, PIP, AMS, TRS                          | 6             |
|      | #3         | Nasal cavity  | AMP, AMC, AMO, PIP, AMS, TRS, TET                     | 2             |
|      |            | Snout surface | AMP, AMC, AMO, PIP, AMS, TRS                          | 2             |
| #6   | #1         | Nasal cavity  | TRS, TET                                              | 7             |
|      |            | Snout surface | TRS, TET                                              | 5             |
|      | #2         | Nasal cavity  | AMP, AMC, AMO, CZO, PIP                               | 1             |
|      |            |               | -                                                     | 1             |
|      |            | Snout surface | TRS, TET                                              | 1             |
|      |            |               | -                                                     | 2             |
|      | #3         | Nasal cavity  | TRS, TET                                              | 3             |
| #7   | #1         | Snout surface | -                                                     | 5             |
|      | #2         | Nasal cavity  | -                                                     | 1             |

<sup>a</sup> as determined by Vitek 2 using cards AST-N214; AMP, ampicillin; AMC, amoxicillin-clavulanate; AMO, amoxicillin; AMS, ampicillin-sulbactam; CIP, ciprofloxacin; CZO, cefazolin; GEN, gentamicin; LEV, levofloxacin; MOX, moxifloxacin; PIP, piperacillin; PIT, piperacillin-tazobactam; TET, tetracycline; TRS, trimethoprim/sulfamethoxazol
